# Supplementary material
Source: HighWire-hosted journal article supplement (https://diabetes.diabetesjournals.org/content/suppl/2006/03/28/55.1.225)
Supplement: SustakOnlineAppendixPg225.pdf [file SustakOnlineAppendixPg225.pdf]

**Supplemental Table I.** Mean and standard deviation of podocyte volume  $\mu\text{m}^3$  measured by the Weibel-Gomez method in db/db and db/m mice at 4, 8, 12, and 20 weeks of age (\* denotes  $p < 0.05$ )

|         | db/m         | db/db         |
|---------|--------------|---------------|
| 4 week  | 150 $\pm$ 42 | 133 $\pm$ 39  |
| 8 week  | 139 $\pm$ 37 | 206 $\pm$ 85  |
| 12 week | 159 $\pm$ 29 | 245 $\pm$ 42* |
| 20 week | 199 $\pm$ 35 | 261 $\pm$ 33* |

**Supplemental Table II.** Mean podocyte number per glomerular profile / mean glomerular volume  $\mu\text{m}^3$  in db/db and db/m mice at 4, 8, 12, and 20 weeks of age

|         | db/m     | db/db    |
|---------|----------|----------|
| 4 week  | 0.081733 | 0.096241 |
| 8 week  | 0.082143 | 0.047573 |
| 12 week | 0.068553 | 0.032653 |
| 20 week | 0.063043 | 0.035249 |
